# Supplementary material for: The Effect of GPRC5a on the Proliferation, Migration Ability, Chemotherapy Resistance, and Phosphorylation of GSK-3β in Pancreatic Cancer
Source: PubMed Central journal article supplement (PMC6073545; doi:10.3390/ijms19071870), 2018-06-26
Supplement: ijms-19-01870-s001.pdf [file ijms-19-01870-s001.pdf]

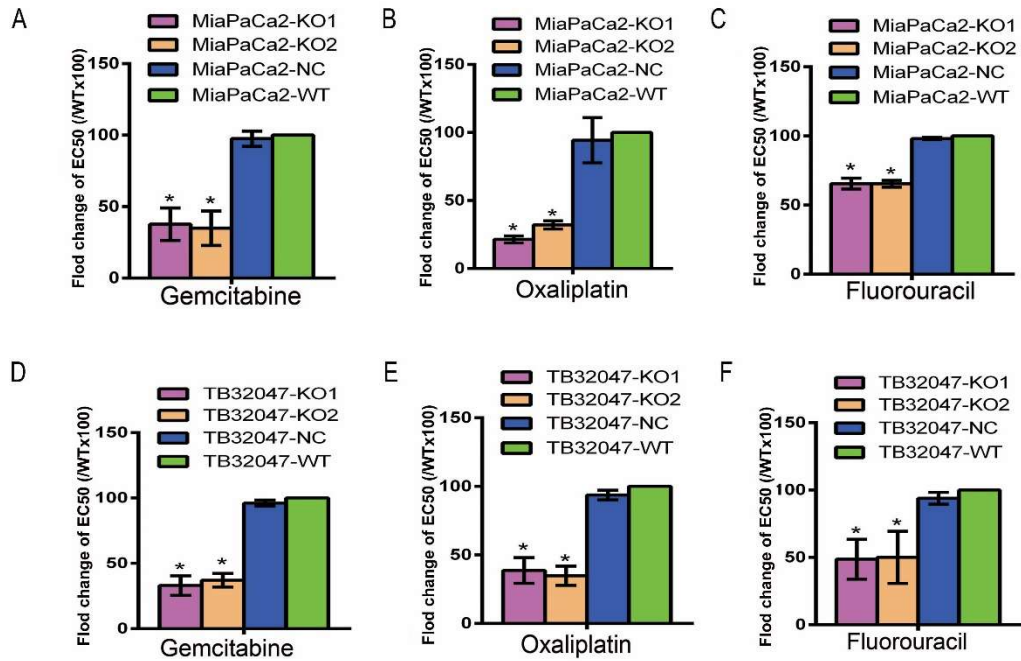

**Figure S1.** Knockout of GPRC5a suppressed chemotherapy drugs resistance in MIA PaCa-2 and TB32047 cells. (A) to (F) showed the statistical results of three independent experiments results of IC50 assay in MIA PaCa-2 and TB32047 cells. \* P value < 0.05.

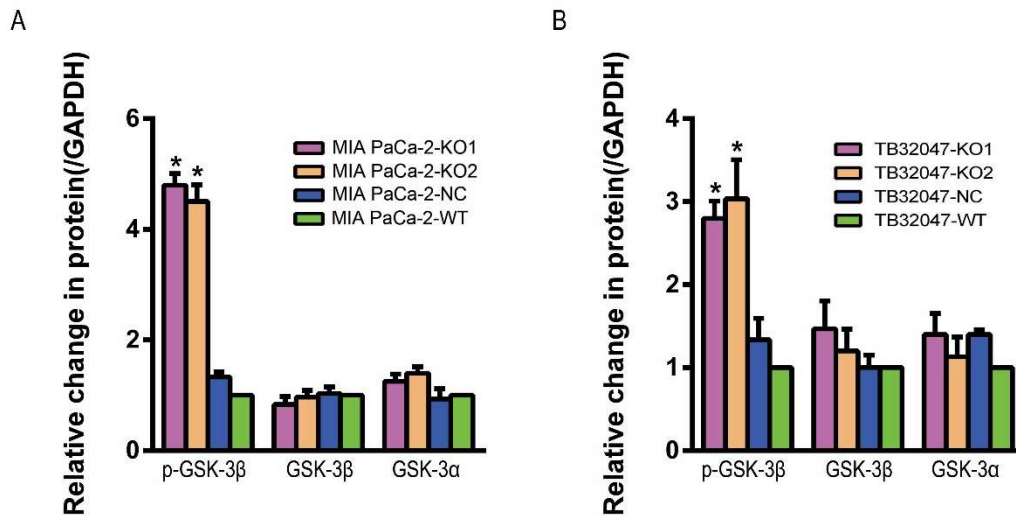

**Figure S2.** Knockout of GPRC5a promoted phosphorylation GSK-3β at Ser9. (A) and (B). The three independent experiments western blot results of GSK3 related proteins were quantified by densitometry in MIA PaCa-2 and TB32047 cells. \* P value < 0.05.
